# Supplementary material for: Comprehensive analysis of serum cytokines in patients with multiple myeloma before and after lenalidomide and dexamethasone
Source: PubMed Central journal article supplement (PMC11259000; doi:10.1002/cam4.70019), 2024-07-19

# Supplementary Figure 3.

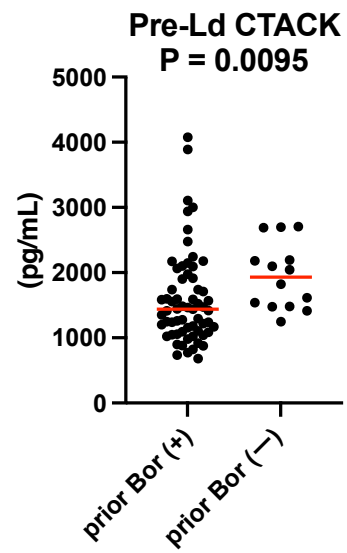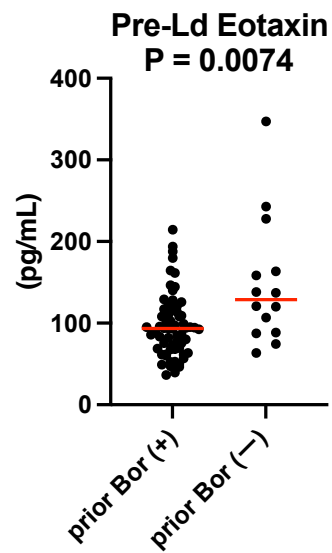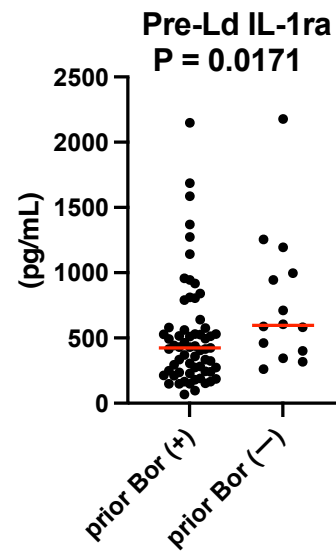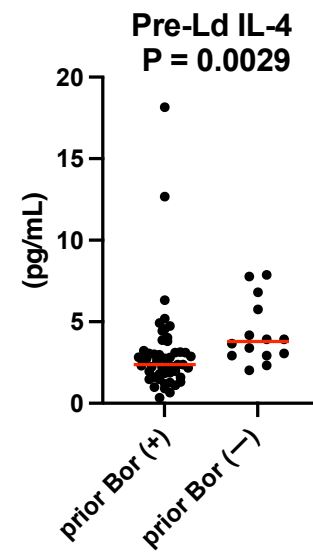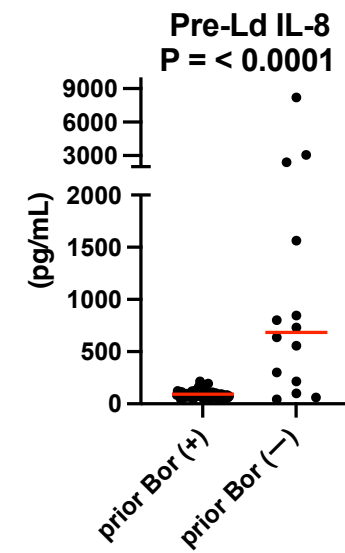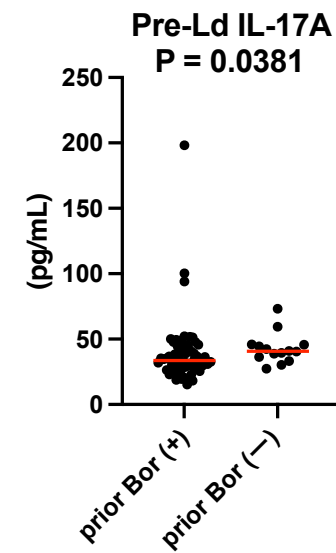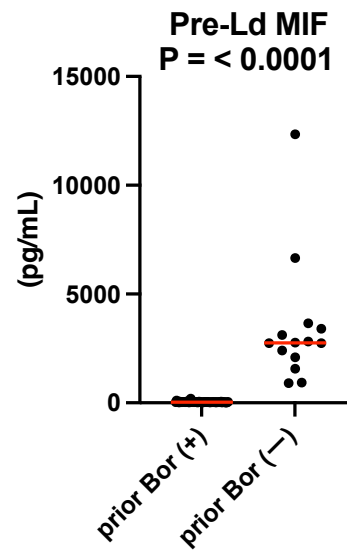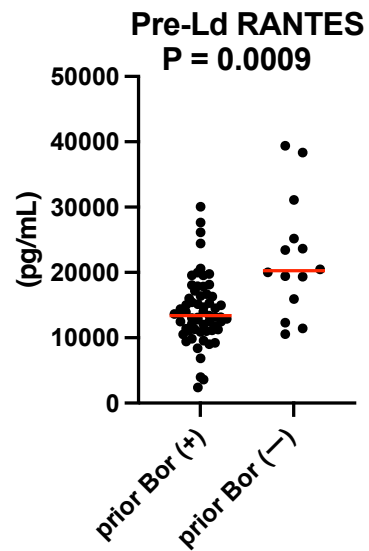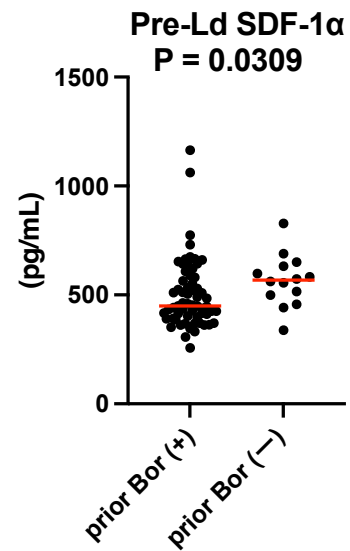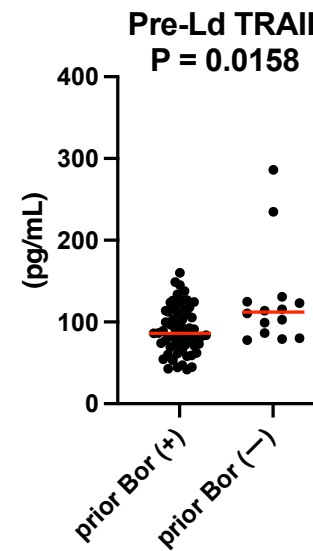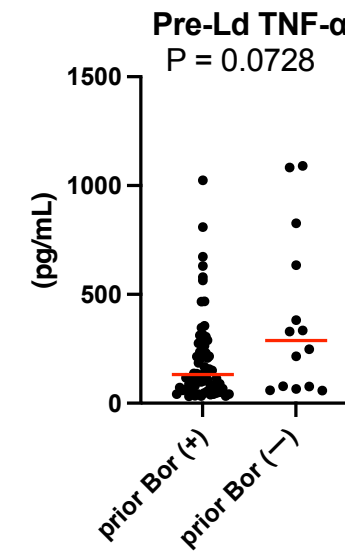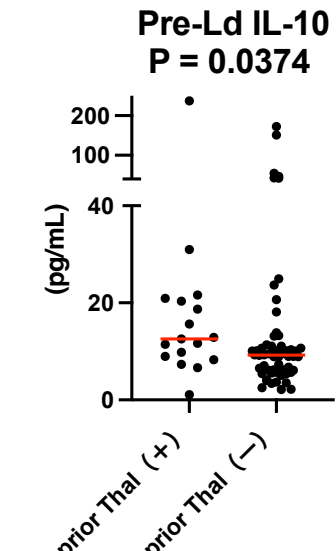

Supplement: CAM4-13-e70019-s001.pdf [file CAM4-13-e70019-s001.pdf]
