# Supplementary material for: Comprehensive analysis of serum cytokines in patients with multiple myeloma before and after lenalidomide and dexamethasone
Source: PubMed Central journal article supplement (PMC11259000; doi:10.1002/cam4.70019), 2024-07-19

**Supplementary Figure 6.**

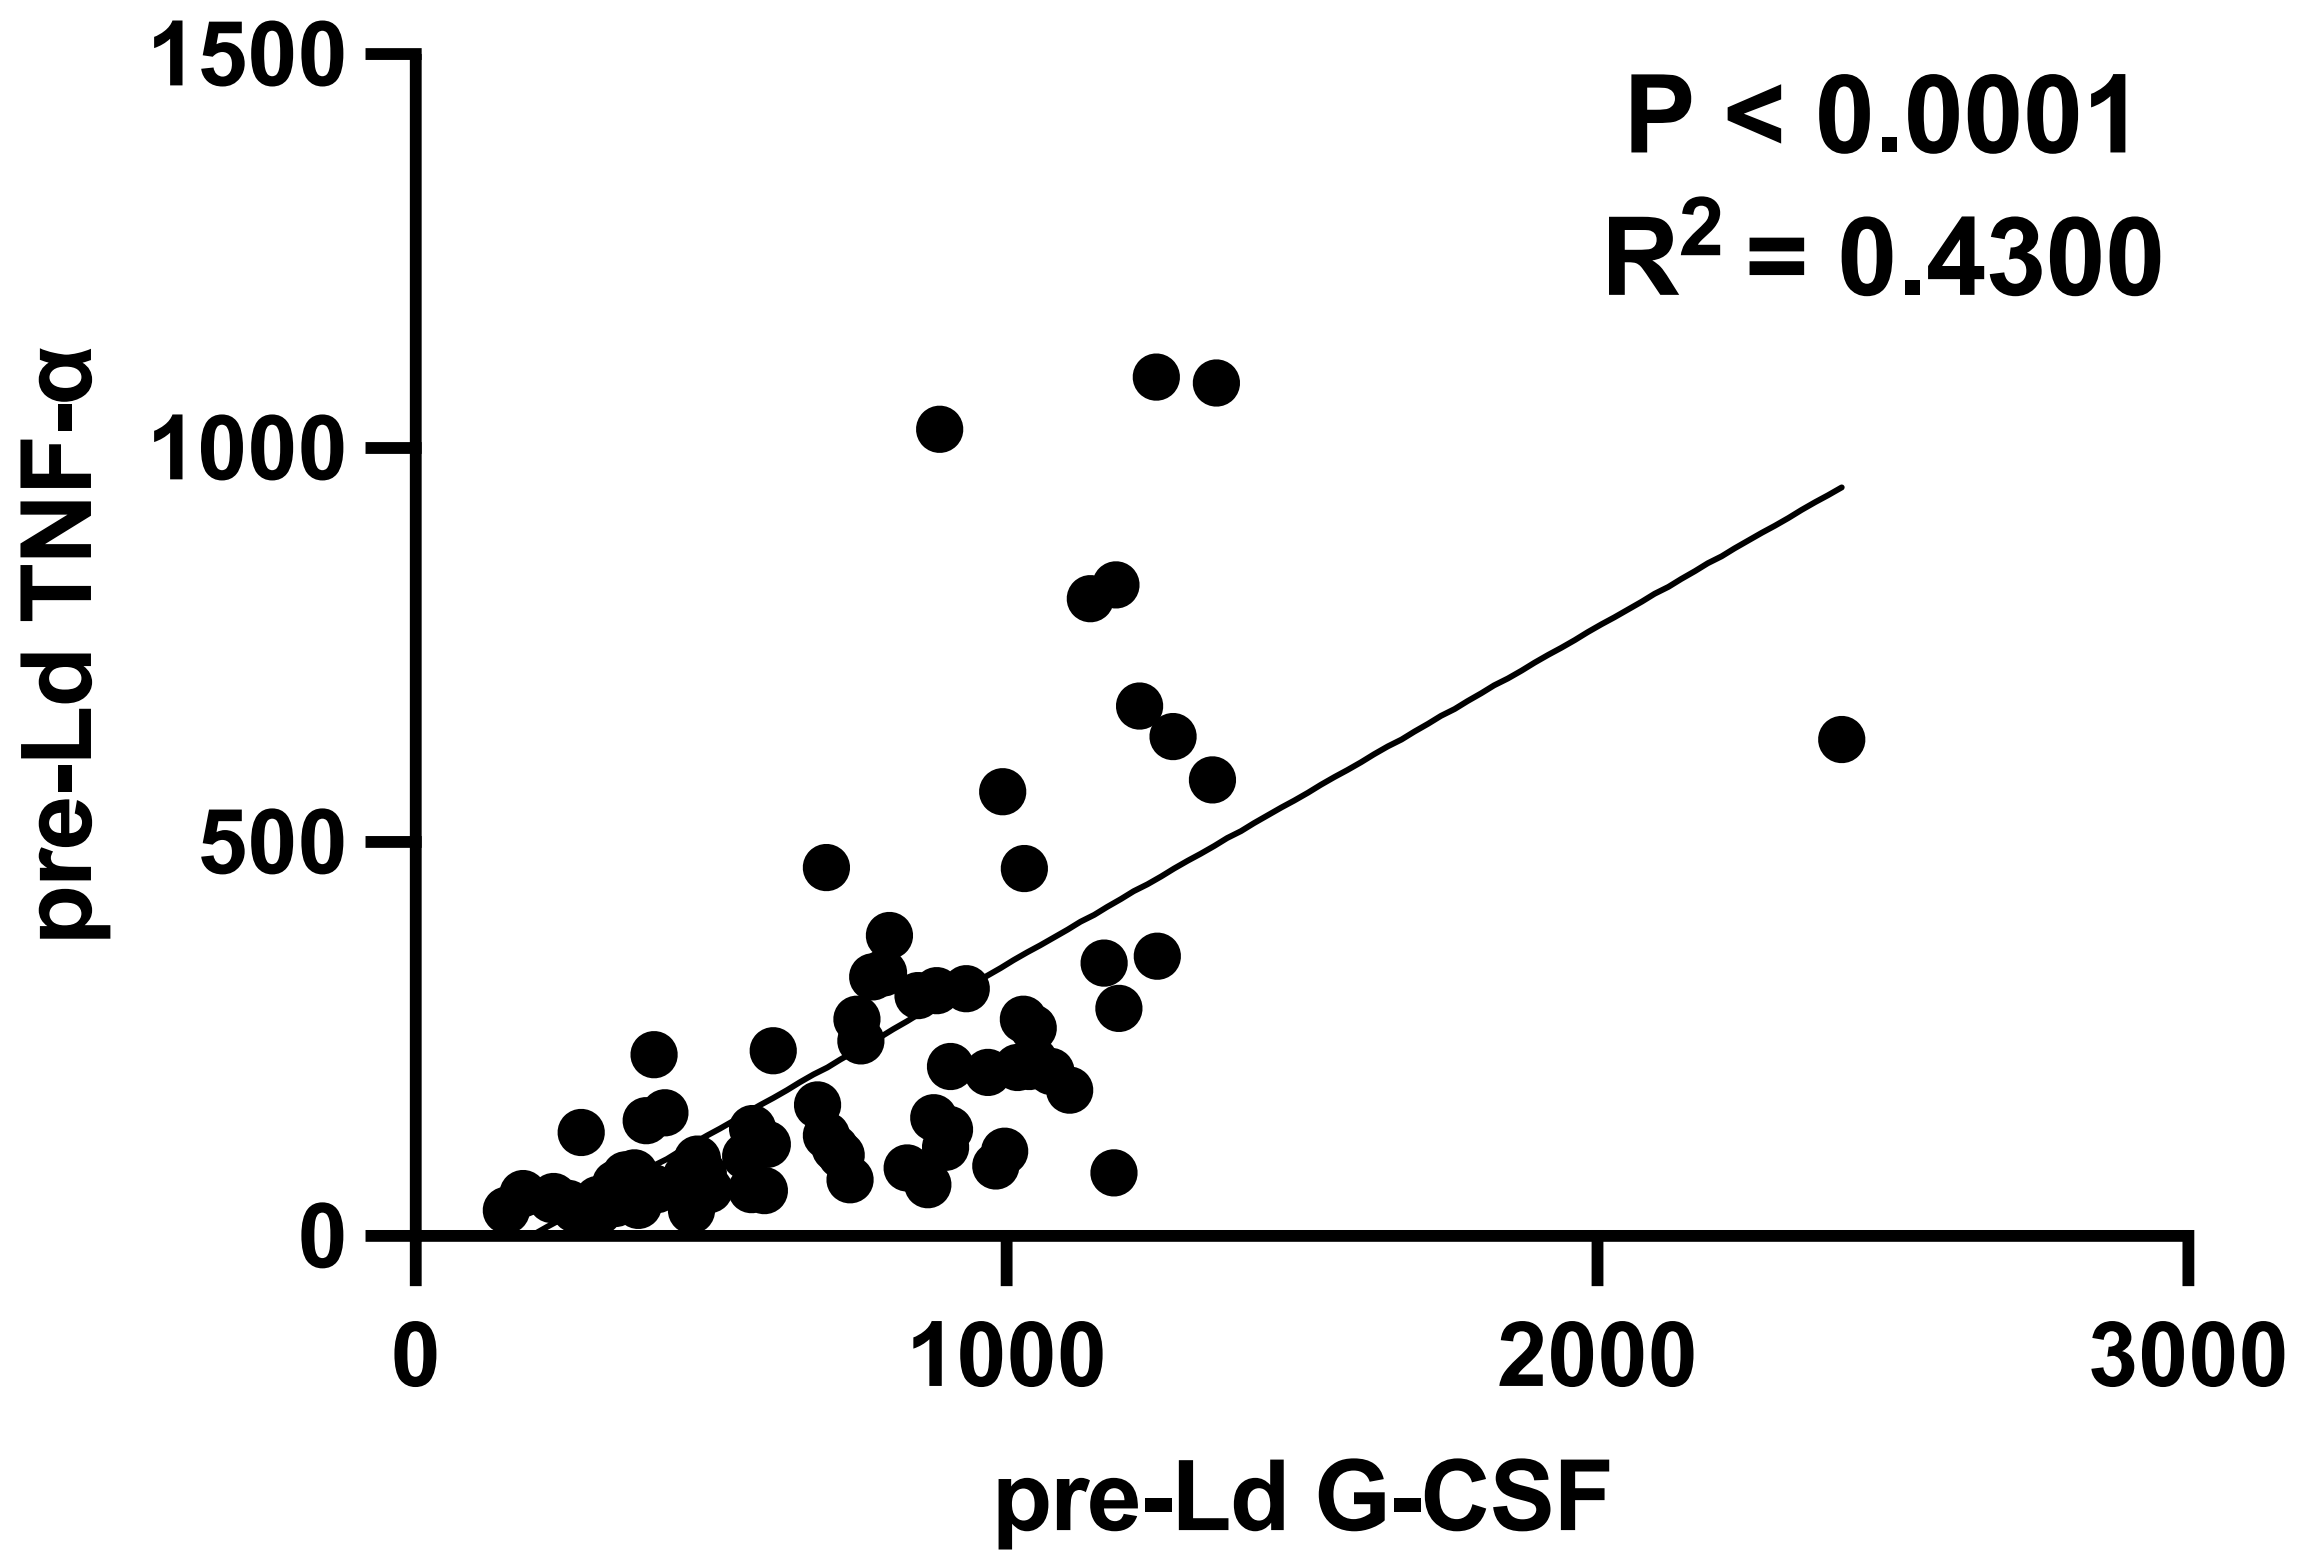

Supplement: CAM4-13-e70019-s004.pdf [file CAM4-13-e70019-s004.pdf]
