# Supplementary material for: Comprehensive analysis of serum cytokines in patients with multiple myeloma before and after lenalidomide and dexamethasone
Source: PubMed Central journal article supplement (PMC11259000; doi:10.1002/cam4.70019), 2024-07-19
Supplement: CAM4-13-e70019-s005.pdf [file CAM4-13-e70019-s005.pdf]

# Supplementary Figure 5.

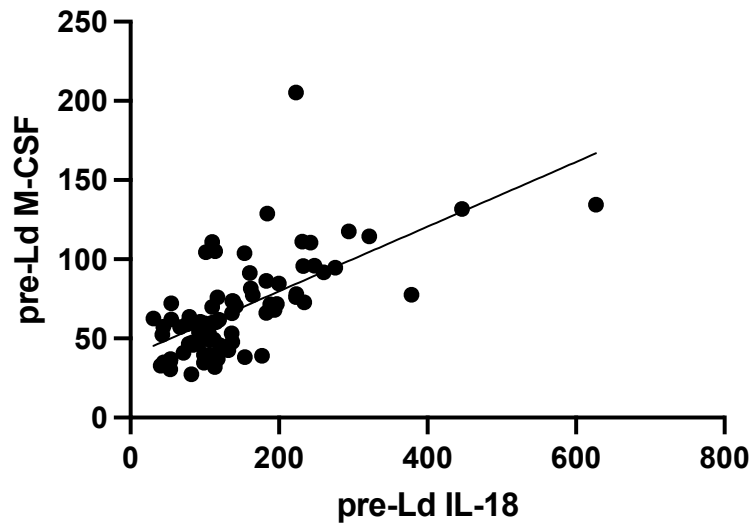

**P = <0.0001**  
**R<sup>2</sup> = 0.4167**

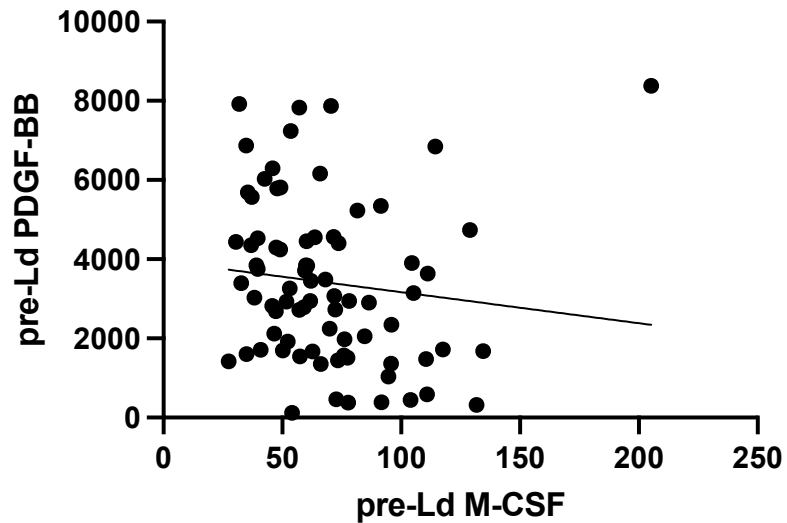

**P = 0.3116**  
**R<sup>2</sup> = 0.01365**

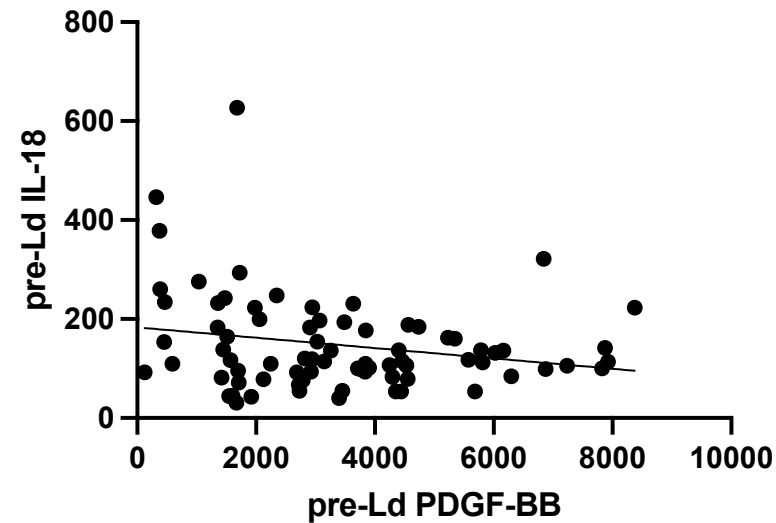

**P = 0.0529**  
**R<sup>2</sup> = 0.04903**
