# Supplementary material for: Comprehensive analysis of serum cytokines in patients with multiple myeloma before and after lenalidomide and dexamethasone
Source: PubMed Central journal article supplement (PMC11259000; doi:10.1002/cam4.70019), 2024-07-19

# Supplementary Figure 4.

**pre-Ld HGF**  
**P = 0.0179**

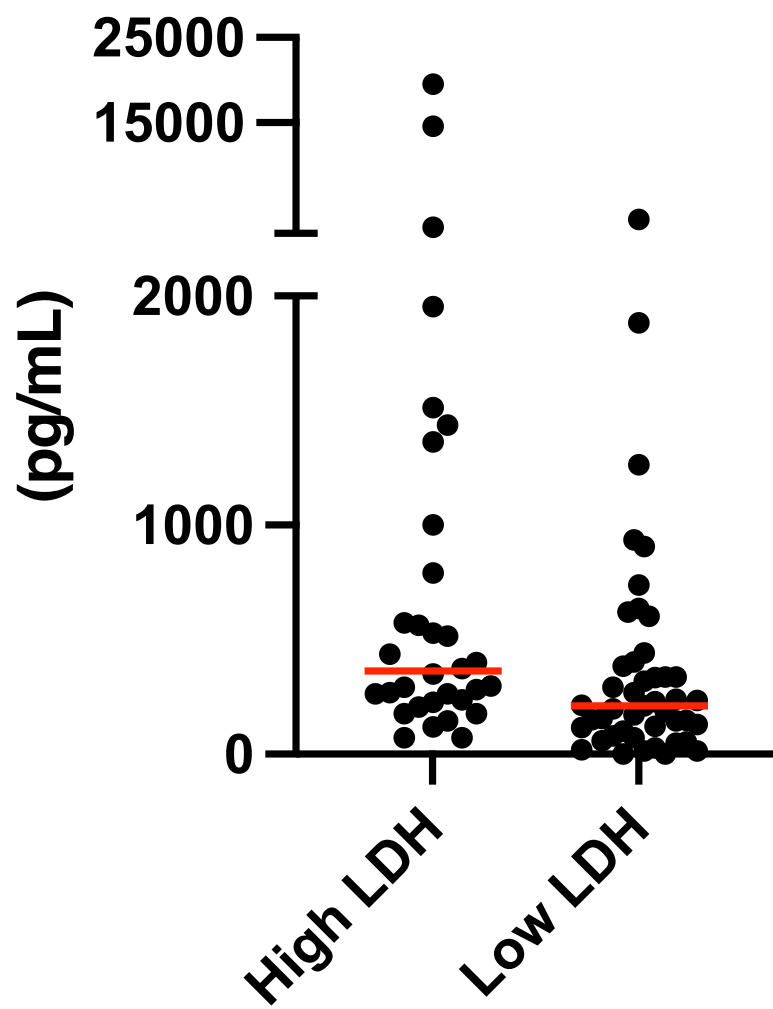

**pre-Ld IL-1ra**  
**P = 0.0193**

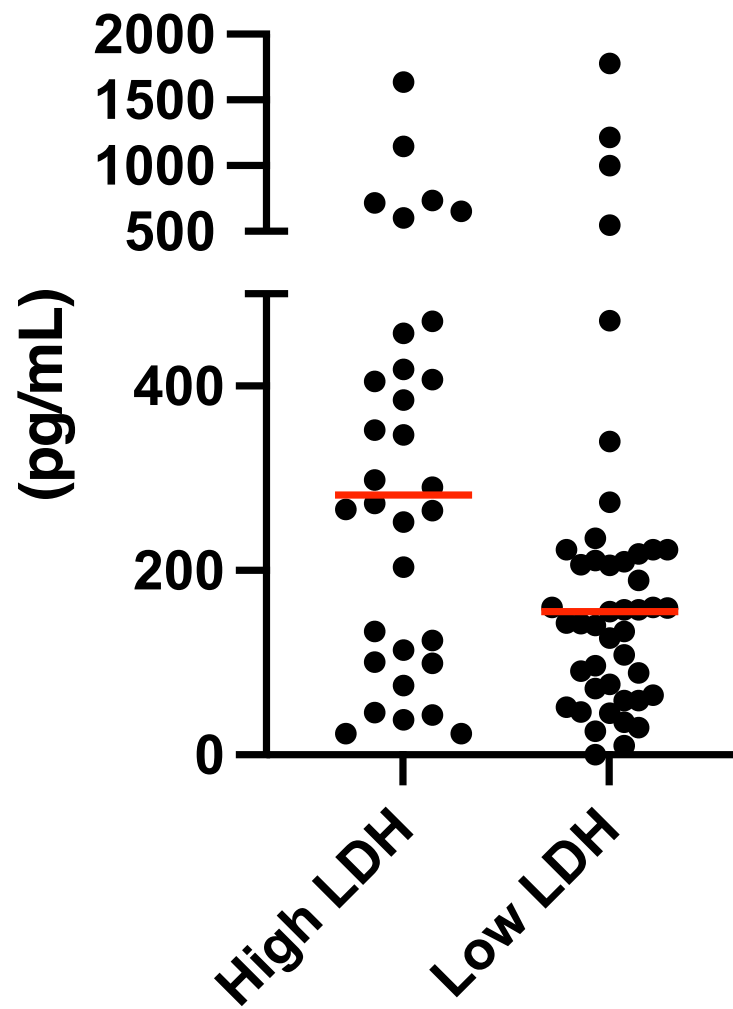

**pre-Ld IL-5**  
**P = 0.0261**

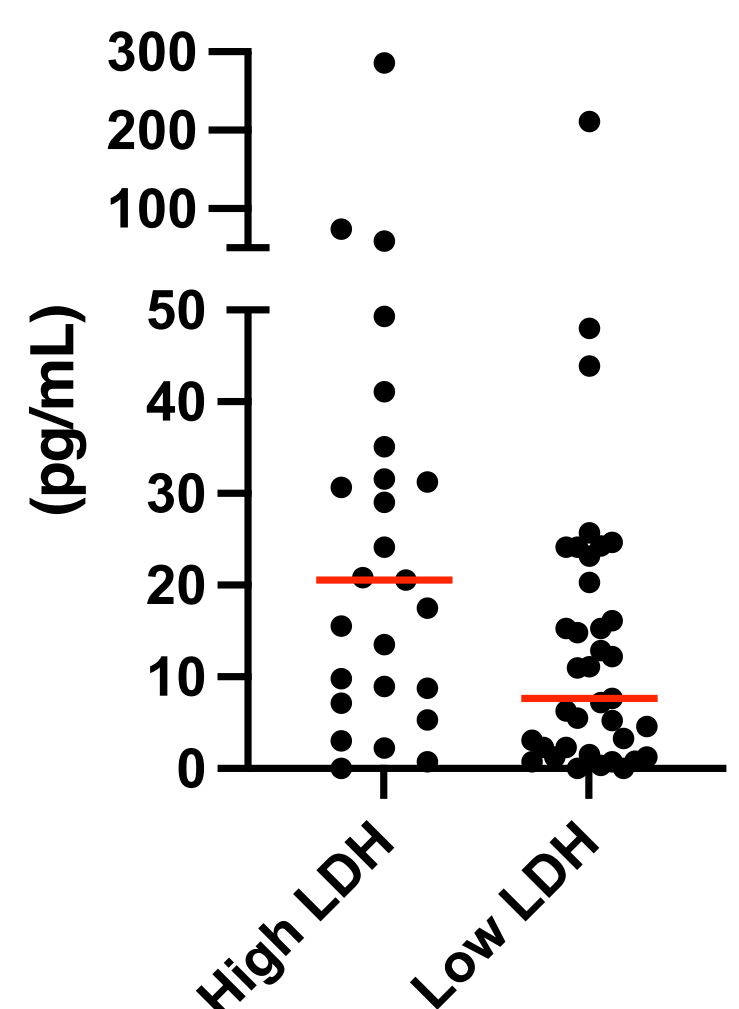

**pre-Ld IL-18**  
**P = 0.0473**

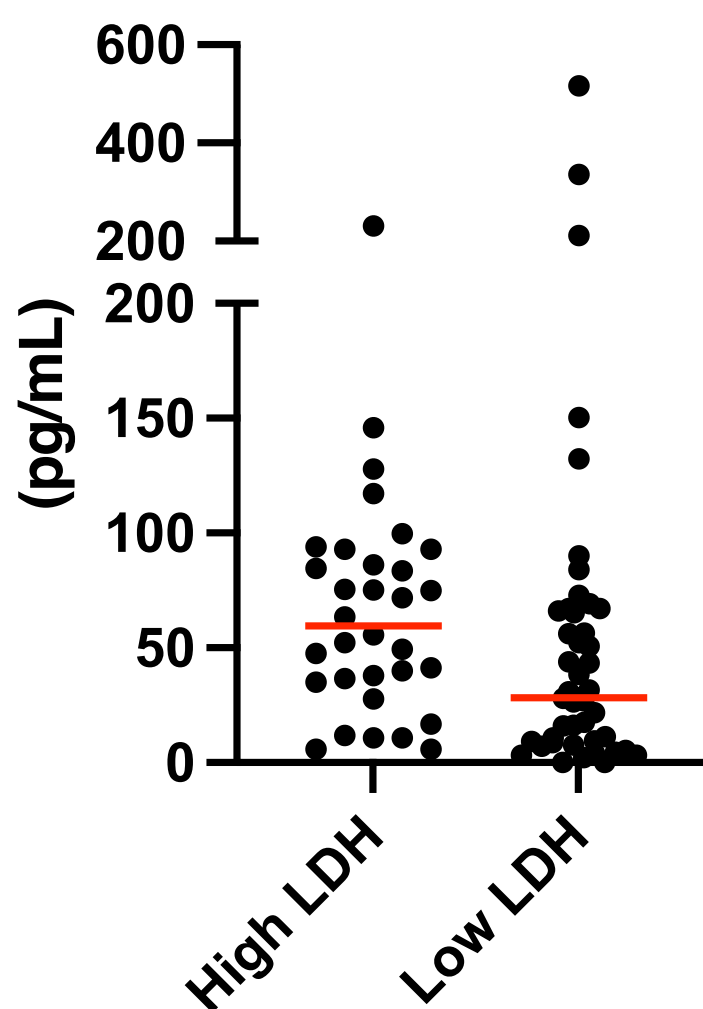

**pre-Ld M-CSF**  
**P = 0.0096**

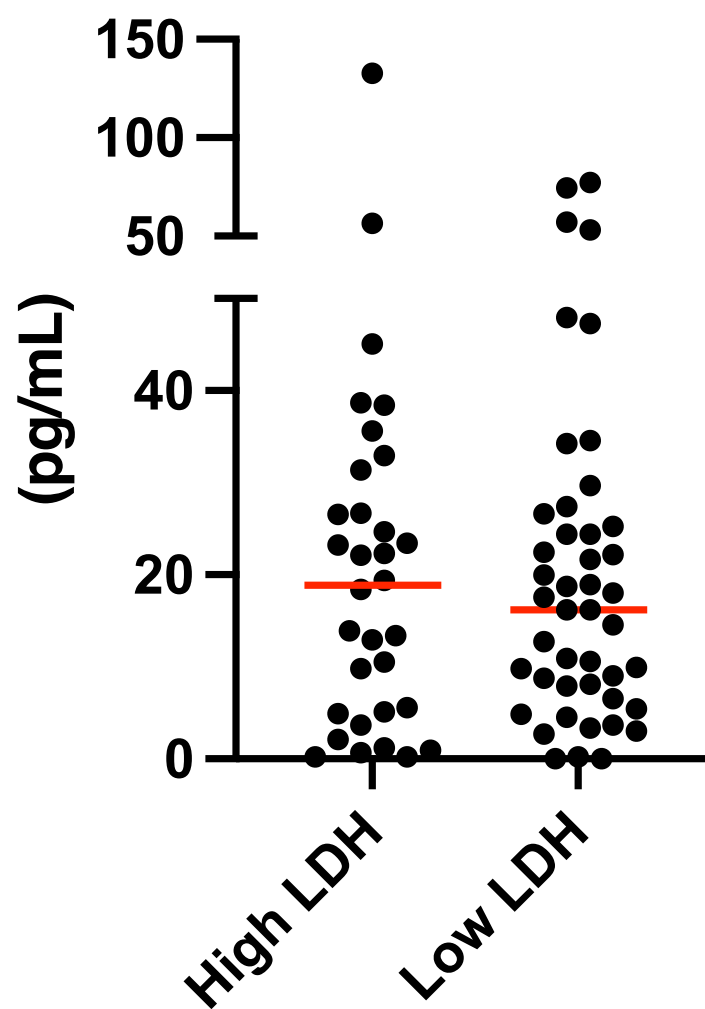

**pre-Ld b-NGF**  
**P = 0.0231**

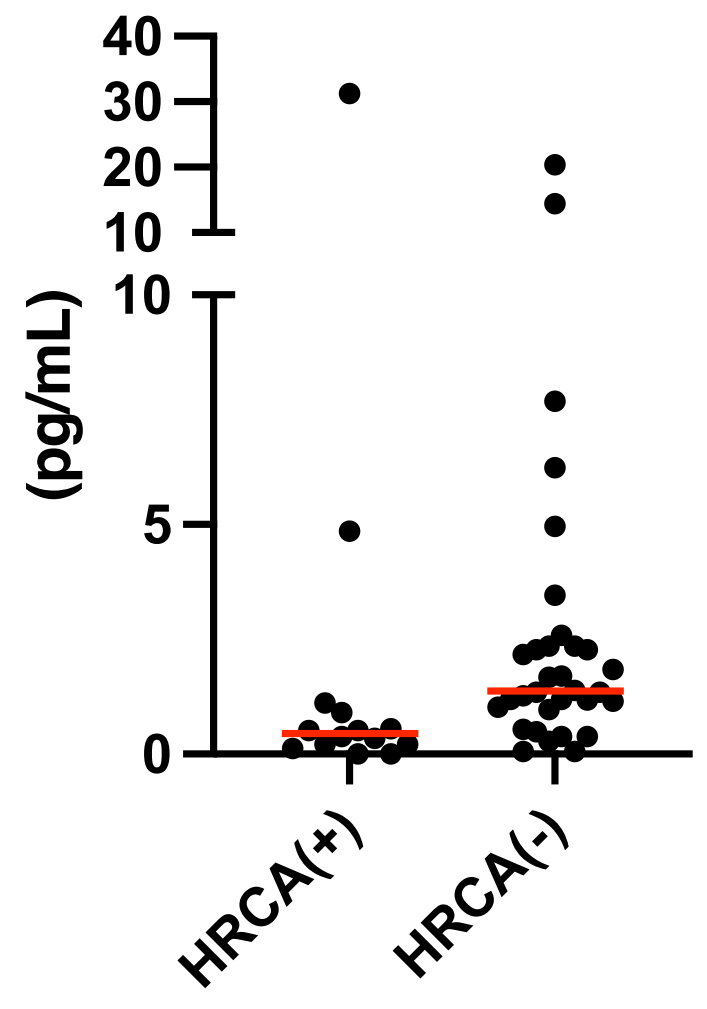

Supplement: CAM4-13-e70019-s009.pdf [file CAM4-13-e70019-s009.pdf]
